# Chronic CNS Pathology is Associated with Abnormal Collagen Deposition and Fibrotic-like Changes

Daphne Palacios Macapagal, Jennifer Cann, Georgia Cresswell, Kamelia Zerrouki, Karma Dacosta, Jingya Wang, Jane Connor and Todd S. Davidson

*Daphne Macapagal, Bioscience IPF/COPD, Research and Early Development, Respiratory and Immunology (R&I), BioPharmaceuticals R&D, AstraZeneca, Gaithersburg, USA*

*Jennifer Cann, Respiratory and Immunology Safety, Clinical Pharmacology & Safety Sciences, , BioPharmaceuticals R&D, AstraZeneca, Gaithersburg, USA*

*Kamelia Zerrouki, Bioscience IPF/COPD, Research and Early Development, Respiratory and Immunology (R&I), BioPharmaceuticals R&D, AstraZeneca, Gaithersburg, USA*

*Karma Dacosta, Clinical Pharmacology & Safety Sciences, Imaging and Data Analytics, BioPharmaceuticals R&D, AstraZeneca, Gaithersburg, USA*

*Jingya Wang, Department of Health and Human Services, Food and Drug Administration, Bethesda, MD USA*

*Jane Connor, Bioscience IPF/COPD, Research and Early Development, Respiratory and Immunology (R&I), BioPharmaceuticals R&D, AstraZeneca, Gaithersburg, USA*

*Georgia Cresswell, Leica Biosystems, Milton Keynes, UK*

*Todd S Davidson, Federation Bio, South San Francisco CA 94080*

26 **Abstract:**

27

28 Multiple sclerosis is a chronic debilitating disease of the CNS. The relapsing remitting  
29 form of the disease is driven by CNS directed inflammation. However, in the  
30 progressive forms of the disease, inflammation has abated and the underlying  
31 pathology is less well understood. In this paper, we show that chronic lesions in  
32 progressive MS are associated with fibrotic changes, a type of pathology that has  
33 previously not thought to occur in the CNS. In an animal model of chronic MS, late  
34 stage disease contains no inflammatory infiltrates and is instead characterized by  
35 collagen deposition that is histologically similar to fibrosis. In human MS samples,  
36 chronic, but not acute lesions, are devoid of inflammatory infiltrates and instead contain  
37 significant collagen deposition. Furthermore, we demonstrate that both mouse and  
38 human astrocytes are the cellular source of collagen. These results suggest that anti-  
39 fibrotic therapy may be beneficial in the treatment of progressive MS.

40

41 **Introduction:**

42 Multiple sclerosis is an autoimmune disease of the central nervous system.

43 Approximately 80-85% of patients with MS present with a relapsing-remitting (RRMS)

44 course of disease characterized by episodes of disability followed by a period of

45 remission.[1] After a period of years, RRMS can convert into a more progressive

46 disease (secondary progressive, SPMS) in which the patients steadily decline. The

47 remaining 15-20% of patients with MS will present with a progressive disease from the

48 onset (primary progressive, PPMS)[1, 2] RRMS is primarily an inflammatory disease

49 wherein T and B cells, along with macrophages infiltrate the central nervous system

50 (CNS) and cause tissue damage. Such lesions can readily be detected by MRI as

51 gadolinium (Gd) enhancing lesions. Though rare, these lesions are not observed in the

52 progressive forms of disease[3]. In addition, RRMS is amenable to treatment with anti-

53 inflammatory treatments, whereas such treatments are generally considered ineffective

54 in treating SPMS and PPMS.

55 Most MS research has been focused on RRMS as it is the most common form of the

56 disease. Less is known about the progressive forms. One hurdle in studying

57 progressive MS has been the lack of appropriate in vivo models. Experimental

58 autoimmune encephalomyelitis (EAE) has been widely used as an animal model of MS.

59 EAE is induced in susceptible strains of mice by immunization with various myelin

60 derived peptides in adjuvant, resulting in T cell activation, migration into the spinal cord,

61 and subsequent paralysis. This approach has been useful in modeling the immune

62 driven aspects of RRMS, but its highly inflammatory nature would seem to make it

63 inappropriate as a model of progressive MS.

64 There does not appear to be major genetic differences between RRMS and progressive  
65 MS in terms of susceptibility loci, etc. This suggests that the various forms of disease  
66 represent stages of the same disease, as opposed to distinct disease entities. We  
67 reasoned that EAE may have similar, unappreciated aspects. For example,  
68 immunization of B6 mice with MOG35-55 in CFA induces a chronic disease driven by  
69 CD4+ T cells. However, the vast amount of research on this model has only focused on  
70 the acute phase of disease, while the chronic phase has been relatively ignored.

71 Here, we take an unbiased gene expression approach to characterizing the chronic  
72 phase of EAE in the B6 mouse to determine its suitability as a model of SPMS. We  
73 determined that chronic EAE is not driven by inflammation, but instead is driven  
74 primarily by abnormal remodeling of the extracellular matrix reminiscent of fibrosis. We  
75 confirm these findings in human samples and demonstrate their association with various  
76 forms of MS. This work demonstrates a previously unappreciated aspect of progressive  
77 MS and suggests avenues to future therapies.

78 **Results:**

79

80 Experimental autoimmune encephalomyelitis in the C57Bl/6 mouse is a well  
81 characterized model of autoimmune mediated neuroinflammation. Often used to  
82 demonstrate aspects of multiple sclerosis, it has been studied at the genetic, cellular  
83 and molecular level where it has been shown to be driven by autoreactive CD4+ T cells  
84 and inflammatory macrophages. Recent advances in genomics technology has  
85 enabled characterization of gene expression profiles at unprecedented scale and  
86 resolution. Most gene expression studies of EAE have focused on highly purified  
87 populations of cells, or even single cell analysis. Moreover, almost all studies have  
88 focused on early time points (days 11-23). While analysis of purified cell populations or  
89 single cell analysis allows deep understanding of the function of a particular cell type, it  
90 necessarily omits changes occurring at the global level.

91 We sought to identify novel pathways regulated during the course of EAE. B6 mice  
92 were immunized with MOG35-55 and spinal cords were collected at various time points  
93 (Figure 1a). We grouped the disease stage into three phases, pre-disease (days 0 and  
94 7), acute disease (days 16 and 23), and chronic disease (days 31 and later). As we  
95 were attempting to identify novel pathways associated with disease progression, and  
96 not simply changes in gene expression levels due to differences in severity, we carefully  
97 selected mice with a clinical score of 3, characterized by limp tail and paralysis of the  
98 hinds limbs, on a scale of 0 to 5 (0=normal; 5=moribund) in the acute and chronic  
99 phases of disease.

100 RNA from the spinal cords of individual mice was analyzed by gene array. The resulting  
101 data were filtered to genes with expression levels changed greater than 1.5 fold  
102 (normalized to 18s) and with p values less than 0.05. This resulted in a list of 1477  
103 genes that were significantly regulated. The overlap of genes amongst the various time  
104 points can be seen in Figure 1b, with the plurality of genes located in the overlap of  
105 days 16, 23, and 31 and thus representing genes that distinguish inflamed from non-  
106 inflamed CNS. PCA analysis of the significantly regulated genes identified three  
107 discreet populations (Figure 1c). Pre-disease spinal cords clustered tightly together,  
108 suggesting minimal to no global changes at the gene expression level preceding  
109 clinically evident disease. Spinal cords from the acute phase of disease also clustered  
110 tightly together, as was expected considering we selected mice with identical clinical  
111 scores. Gene expression data suggest that spinal cords from the chronic time point  
112 clustered separately from either of the aforementioned populations. This was  
113 somewhat unexpected, as we selected mice with identical clinical scores to those in the  
114 acute phase of disease. This indicates that although mice in the acute and chronic  
115 phase of disease have identical clinical presentations, the underlying gene expression  
116 patterns are dramatically different.

117 This can be visually seen in Figure 1d, where the gene expression patterns between  
118 pre-disease and acute disease exhibit an almost inverse relationship. This was likely  
119 due to the influx of inflammatory cells that are not normally present in the CNS. The  
120 expression pattern at the chronic phase of the disease shows a downregulation of  
121 certain genes that were later upregulated in the acute phase. Likewise, an inverse

122 upregulation of a certain number of genes that were downregulated during the acute  
123 phase.

124 We next used Gene Set Enrichment Analysis (GSEA) to identify pathways regulated  
125 during different phases of disease. As expected, a number of pathways involved in the  
126 inflammatory response were upregulated in acute disease relative to pre-disease.

127 These pathways included the IFN- $\gamma$  response (Figure 1e) and the inflammatory  
128 response gene set (Figure 1f). Less well studied in EAE has been IFN- $\alpha$ , but this gene  
129 set was also clearly regulated (Figure 1g). However, closer inspection of this particular  
130 gene set shows significant overlap with the genes regulated in the IFN-  $\gamma$  gene set,  
131 suggesting that IFN-  $\alpha$  may not be the driving factor. Importantly, these three gene sets  
132 showed upregulation of key inflammatory genes during the acute disease stage that  
133 were subsequently down regulated in the chronic phase.

134 To this point we had identified a clear difference at the gene expression level between  
135 acute and chronic disease. The majority of the regulated genes were associated with  
136 inflammation and were downregulated at the chronic phase of the disease. Since mice  
137 in the acute and chronic phases had identical clinical scores, it was unclear what  
138 pathways were being activated to drive pathology at the later stage. We therefore  
139 identified GSEA pathways which were upregulated in the chronic phase, but not during  
140 the acute or pre-disease stages. We identified only one such GSEA gene set which  
141 clearly fit this criteria, epithelial mesenchymal transition (Figure 1h). EMT (Epithelial  
142 Mesenchymal Transition) is a pathway in which epithelial cells transform into  
143 mesenchymal cells and is one of several mechanisms which can lead to the  
144 development of fibrosis. A key driver of EMT is TGF- $\beta$  signaling. We identified

145 upstream mediators of TGF- $\beta$  signaling in acute disease and downstream mediators of  
146 TGF- $\beta$  signaling in chronic disease which clearly fits this criteria (Figure 1i).

147 We first sought to confirm our gene array data and examined more closely the  
148 expression profiles of fibrosis associated genes in the CNS. To this end, we designed a  
149 Fluidigm panel with an array of fibrosis related probes, including multiple collagen  
150 isoforms, genes involved in collagen organization, as well as a number of cytokines  
151 known from other organ systems to be involved in inducing collagen synthesis. The  
152 panel also included a number of neuronal specific markers and genes involved in the  
153 inflammatory response. This analysis included RNA from the original samples used to  
154 run the gene array, as well as additional samples isolated from an independent  
155 experiment.

156 Hierarchical clustering of the Fluidigm results (Figure 2a) demonstrated clusters of  
157 genes regulated at various stages of disease. We confirmed upregulation of  
158 inflammatory genes in acute disease relative to pre-disease, followed by downregulation  
159 in chronic disease. We also identified a cluster of neuronal markers that were down  
160 regulated in acute disease relative to pre-disease. This could be due to death of  
161 neurons or could be reflective of the fact that the majority of the RNA in these samples  
162 were derived from inflammatory cells thus diluting the neuronal cells RNA in the sample  
163 as a whole. Importantly, we saw upregulation of a number of collagen genes, including  
164 Col1a1, Col1a2, Col3a1 and Col4a1, all of which are important constituents of fibrotic  
165 lesions (Figure 2b). We also saw upregulation of a number of genes involved in  
166 organization of the collagen matrix, including Lumican, FAP, FMOD and Serpin1. TGF-  
167  $\beta$  and its receptors TGF $\beta$ R1 and TGF $\beta$ R2 were upregulated in both acute and chronic



168 disease. IL-13, also known to be involved in the progression of fibrosis, was  
169 upregulated in acute disease along with its receptor IL-13Ra1, while its decoy receptor  
170 IL-13Ra2 was downregulated.

171 EAE is known to be driven by CD4+ Th1 cells and inflammatory macrophages. Our  
172 gene expression data suggests that inflammation has abated during the chronic stage  
173 of the disease. We confirmed this by flow cytometric analysis of CNS infiltrating  
174 leukocytes at various time points (Figure 2c). As stated before, we only selected mice  
175 with a clinical score of 3. We found large numbers of CD45+ cells in the CNS of mice  
176 on day 21, the peak of EAE disease. This number declined by day 28, and we found  
177 almost no CD45+ cells in the CNS on day 42, despite the fact that the mice still had  
178 significant clinical disease. Subset analysis of CD45+ cells identified a similar pattern  
179 for CD4+IFN- $\gamma$ + cells, as well as inflammatory monocytes, macrophages, and mDCs.

180 Our current understanding of EAE is that it is driven almost exclusively by inflammation.  
181 However, these data suggest that during the chronic stage of the disease inflammation  
182 has abated and fibrosis drives pathology. This is a common pathway in many diseases,  
183 but to our knowledge fibrosis has never been documented in the CNS. We therefore  
184 sought to identify fibrotic lesions in the spinal cords of chronic stage EAE mice at the  
185 histological level. We isolated spinal cords from mice with EAE at various time points  
186 and stained them with Sirius Red (Figure 3a), Masson's Trichrome (Figure 3b) and H&E  
187 (Figure 3c). Sirius red and Masson's trichrome stained sections showed no evidence of  
188 fibrosis or abnormal collagen deposition up to day 23. By day 31, abnormal  
189 accumulations of collagen were present along the meningeal interface and by day 41  
190 abnormal collagen deposition was clearly present throughout the parenchyma. The

191 pattern of collagen deposition was clearly abnormal for the CNS, but it was not a classic  
192 fibrosis morphology with compact bundles of mature collagen. Perivascular collagen  
193 deposition was clearly evident, but the majority of collagen was in the parenchyma and  
194 had a fibrillar deposition. H&E sections demonstrated inflammatory infiltrates in acute  
195 disease that had abated by the chronic phase.

196 In most organ systems, fibrosis is mediated by activated fibroblasts. However, the CNS  
197 is devoid of such cells, raising the question of which cells produce collagen. We  
198 approached this question by co-staining for collagen and various cell types in the CNS  
199 of mice with EAE. We found by brightfield microscopy that collagen was associated  
200 with astrocytes in diseased, but not normal tissues (Figure 4a). In normal tissue,  
201 collagen was associated solely with vessels, and astrocytes were distributed evenly  
202 throughout the tissue with characteristic stellate morphology. In mice with chronic EAE,  
203 the astrocytes significantly changed their morphology displaying much smaller cell  
204 bodies with a fibrillar morphology. To more conclusively demonstrate colocalization of  
205 collagen and astrocytes, we analyzed the sections by confocal microscopy (Figure 4b).  
206 Non-vascular collagen was found to be significantly, although not exclusively associated  
207 with GFAP+ cells.

208 EAE in the B6 mouse is a chronic disease. We have thus far shown that in the later  
209 stages of disease, inflammation has abated and the prevailing pathology is fibrotic. We  
210 next asked to what extent these fibrotic changes are responsible for the clinical  
211 pathology. We and others have previously shown that neutralizing GM-CSF reverses  
212 established disease [4] [5] and [6]. Mice treated with anti-GMCSFR have reduced T cell  
213 and inflammatory macrophage infiltrates [4]. We treated mice with established EAE

214 with CAM3003 (anti-GMCSFR) or isotype control and allowed the mice to recover.  
215 Spinal cords from mice treated with CAM3003 had fewer Sirius red lesions than mice  
216 treated with isotype control (Figure 5a and b). These results suggest that in the chronic  
217 stage of disease, GM-CSF signaling is required for the establishment of fibrosis and not  
218 the progression of inflammation.

219 To assess collagen content in MS, we immunohistochemically stained sections of brain  
220 from human MS patients for collagen-1a (Figure 6a). In all areas of the brain, strong  
221 reactivity for collagen-1a was seen in the basement membranes of blood vessels,  
222 including small capillaries throughout the neuropil. In chronic demyelinated and sclerotic  
223 foci within the white matter, additional fine fibrillar structures and mononuclear cells with  
224 fusiform or stellate morphology were also strongly positive for collagen-1a. To  
225 determine if these might represent reactive endothelium or attempts at  
226 neovascularization, we immunohistochemically stained a separate nearby section for  
227 the endothelial cell marker, CD31 (Figure 6b) [7, 8]. In all areas of the brain, moderate  
228 to strong reactivity for CD31 was seen in endothelial cells, colocalizing with the  
229 underlying collagen-1a+ basement membranes. However, there was no CD31 staining  
230 of the fine fibrillar structures or mononuclear cells with fusiform morphology within the  
231 sclerotic foci that were strongly positive for collagen-1a. To determine if these might  
232 represent astrocytes cell bodies and their processes, we immunohistochemically  
233 stained a nearby section with GFAP (Figure 6c). In non-sclerotic areas of the brain,  
234 astrocyte cell bodies and their processes were strongly positive for GFAP, but the  
235 surrounding cells and neuropil were negative. In the sclerotic foci, strongly positive  
236 astrocyte cell bodies and their processes were densely packed and colocalized with the

- 237 collagen-1a+ fine fibrillar structures and mononuclear cells. This suggests that within the
- 238 glial scar, some astrocytes are actively producing and depositing collagen-1a.

239 **Discussion:**

240 In this study we identified a strong fibrosis associated gene signature in late stage EAE.  
241 We demonstrate abnormal collagen deposition at the histological level and show that  
242 similar pathological changes happen in human MS samples. These changes only  
243 occurred at very late time points in the course of the disease and coincide with a  
244 marked reduction in inflammatory infiltrates. Therapeutic intervention with GM-CSFR  
245 blocking antibodies ameliorated inflammation and prevented late stage fibrotic changes.  
246 Finally, we demonstrated that astrocytes are the source of the abnormal collagen  
247 deposition.

248 Fibrosis is the formation of fibrous connective tissue as the result of deposition of  
249 extracellular matrix proteins [9, 10]. Fibrosis has been demonstrated in the meninges  
250 [11] [12] yet is thought to not occur in the CNS. Indeed, we found a very distinct pattern  
251 of collagen deposition in CNS lesions. These lesions were highly fibrillar and located in  
252 chronic resolving lesions. We had considered that the collagen deposition we were  
253 seeing was related to neovascularization as such processes are known to take place in  
254 a number of other pathological process in the CNS such as traumatic brain injury, stroke  
255 and ocular neovascularization [13] [14]. However, we found no co-localization of CD31  
256 with collagen producing cells in MS lesions, suggesting that the collagen deposition  
257 observed was not related to neovascularization.

258 The deposition of collagen could negatively influence reparative processes. For  
259 example, oligodendrocyte precursor cells are unable to differentiate into mature  
260 myelinating oligodendrocytes on stiff matrices [15]. The role of matrix stiffness has  
261 been investigated much more extensively in various fibrotic diseases such as those of

262 the lung and skin [16-19]. In these instances, stiff collagen matrices dramatically alter  
263 the phenotype of resident stromal cells. Our results would suggest that abnormal  
264 collagen deposition in the CNS impairs normal physiology.

265 Scarring is a well appreciated feature in MS plaques, but to our knowledge this study is  
266 the first demonstration that MS plaques are associated with abnormal collagen  
267 deposition. Scarring is associated with astrogliosis and recently astrocytes were shown  
268 to adopt a neurotoxic phenotype – termed A1 astrocytes – in MS lesions [20]. Itoh et al  
269 have shown in late stage EAE that astrocytes downregulate genes involved in the  
270 cholesterol biosynthesis pathway and upregulate proinflammatory genes [21]. In  
271 addition, numerous studies have demonstrated dysfunctional astrocytes associated with  
272 axonal degeneration [22]. These studies demonstrate that astrocytes play a detrimental  
273 role in chronic CNS disease. Our work expands on this concept by showing that  
274 astrocytes produce collagen and that this collagen prevents productive repair.

275 In this study we investigated gene expression changes in the spinal cord of mice during  
276 different stages of EAE. We carefully selected mice with identical disease scores so  
277 that any changes we uncovered were due to the stage of the disease, and not related to  
278 severity. We chose to analyze whole spinal cord as opposed to isolated cell  
279 populations. Such an approach limits the ability to ascribe any gene changes to a  
280 specific cell type but allowed us to identify pathways occurring at a more global scale  
281 that may have been missed had we chosen to focus on individual cell populations.  
282 GSEA analysis identified pathways that were differentially regulated at various stages of  
283 the disease. As expected, acute and peak disease states were associated with a  
284 massive upregulation of proinflammatory genes. EAE is well known to be driven by

285 inflammation, yet at the chronic stage of the disease inflammation has completely  
286 abated and despite the fact that the mice continued to display clinical symptoms. The  
287 main pathways that were upregulated at these later time points were associated with  
288 fibrosis, suggesting that this is the predominant pathway associated with pathology at  
289 this stage.

290 Relapsing remitting MS is highly inflammatory and immunomodulatory treatments are  
291 relatively successful at controlling disease [23, 24]. The progressive forms of MS are  
292 less inflammatory and have proven to be relatively refractory to immunomodulatory  
293 interventions [1, 25]. Progressive MS lesions are characterized by neurodegenerative  
294 changes including axonal damage and gliosis [1]. Indeed, it was in these lesions that  
295 we identified high levels of abnormal fibrotic changes. Although there are currently no  
296 truly effective treatments for progressive MS, a considerable amount of research has  
297 been focused on neuroregenerative approaches. Our data suggest that antifibrotic  
298 approaches may be beneficial as well. Indeed, it may be that antifibrotic interventions  
299 will be required for successful neuroregeneration to occur.

300

301 **Figure Legends:**

302 Figure 1: A, Schematic of experimental design. B6 mice were immunized with MOG35-  
303 55 on day zero and spinal cords were harvested on the indicated days. Mice sacrificed  
304 on days 0 and 7 had a clinical score of 0, while only mice with a clinical score of 3 were  
305 selected at the following time points. B, Venn diagram showing the overlap of regulated  
306 genes at the indicated time points. C, PCA plot showing clustering of individual mice at  
307 the indicated time points for genes regulated at FDR < 0.05. D. Heatmap display of  
308 using the same parameters as in C. E-I, Heatmaps of genes regulated in GSEA genes  
309 sets according to disease phase.

310 Figure 2: A, Fluidigm analysis of genes identified in the gene array. Genes were  
311 selected based on their appearance in the GSEA gene sets related to collagen,  
312 cytokines, and collagen organization. B, Kinetic profiles of select gene expression levels  
313 as determined by Fluidigm analysis. Pre-disease indicated in blue, active disease  
314 indicated in yellow. C, Total cell counts of the indicated populations in the spinal cord as  
315 determined by flow cytometry. Total cells are all CD45+ cells, total CD4 is CD45+CD4+,  
316 CD4+IFN $\gamma$ + is CD45+CD4+IFN $\gamma$ +, Tregs are CD45+CD4+Foxp3+, Inflammatory  
317 monocytes are CD45+ CD11b<sup>+</sup> CD11c<sup>-</sup> Ly6G<sup>-</sup> Ly6C<sup>hi</sup>, macrophages are CD45+ CD11b<sup>+</sup>  
318 CD11c<sup>-</sup> Ly6G<sup>-</sup>.

319 Figure 3: B6 mice were immunized for EAE and sacrificed on the indicated days. The  
320 clinical score (CS) of each individual animal is indicated. Serial sections were stained  
321 with Sirius Red, A, Masson's Trichrome, B, or H&E, C, to identify areas of fibrosis and to  
322 characterize histologically.



323 Figure 4: Fluorescent microscopy demonstrates co-localization of collagen to GFAP+  
324 astrocytes. B6 mice were immunized for EAE and sacrificed at either day 0 (clinical  
325 score of 0) or day 54 (clinical score of 3). Spinal cords were collected and processed for  
326 fluorescent microscopy by staining with GFAP (yellow), Collagen 1 (red) and DAPI  
327 (blue) and analyzed by fluorescent microscopy, A, or by confocal microscopy, B.

328 Figure 5: Anti-GMCSFR prevents the establishment of fibrosis in the CNS. B6 mice  
329 were immunized for EAE. At peak of disease (day 14) mice were treated  
330 intraperitoneally every other day with 10mg/kg anti-GMCSFR (CAM3003) or control until  
331 disease subsided. Spinal cords were collected, paraffin embedded and stained with  
332 Sirius Red to detect collagen deposition. A, representative images obtained under either  
333 brightfield or polarized conditions at 20X magnification. B, each dot represents the  
334 average lesions per field for an individual mouse obtained under 10X magnification for  
335 mice that received either CAM3003 or control treatments.

336 Figure 6: Collagen deposition in MS plaques. Samples of human MS tissue were  
337 stained for collagen-1a, A, CD31, B, or GFAP, C and evaluated by brightfield  
338 microscopy.

339

340 **Methods:**

341 **Induction of Active EAE Disease and Scoring.** EAE was induced in 6-9 week old female C57BL/6 mice.

342 On day 0, animals were immunized subcutaneously in the flanks with 400µg of myelin oligodendrocyte

343 glycoprotein 35-55 (MOG 33-55) (MEVGWYRSPFSRVVHLYRNGK; Anaspec Inc. Catalog No. AS-60130-1)

344 in a 200ul emulsion of Complete Freund's Adjuvant (4mg/ml Mycobacterium tuberculosis; Difco Labs

345 Catalog No. 263810). On day 0 and day 2, 350ng of Pertussis toxin (Bordetella pertussis; Calbiochem

346 Catalog No 516 560-50ug) was injected intra-peritoneally (i.p.). EAE scores were assessed daily for

347 clinical signs of EAE in a blinded fashion. Animals were scored as follows: 0=normal; 1=limp tail; 2=hind

348 leg paralysis of one leg or difficulty walking/ataxia; 3=paralysis of both hindlimbs (paraparesis) and tail;

349 4=hindlimbs paraparesis and one forelimb weakness; 5=moribund (requires sacrifice). All animal

350 procedures were approved by the IACUC board (Institutional Animal Care and Use Committee) of

351 Medimmune Inc. and the protocols followed were in accordance to the guidelines with the Animal

352 Welfare Act (AWA).

353 **CNS tissue isolation.** Animals were asphyxiated using a lethal dose of CO<sub>2</sub>. Animals showing no signs of

354 pedal and palpebral reflex were first perfused intracardially using room temperature saline. The spinal

355 cords were isolated and frozen on dry ice. Spinal cords were collected at naïve (score 0, day 0), onset

356 (score 0, day 7), peak (score 3-4, day 16), post peak (score 3, day 23) and chronic (score 3 or higher, day

357 30-onward) clinical points. These samples were stored at -80°C until further processing for RNA

358 extraction. Samples that were to be processed for immunohistochemistry, Sirius red or Masson's

359 Trichrome were placed in 10% formalin for 24 hours followed by paraffin embedding. Other spinal cords

360 were isolated and frozen at -80°C in Tissue-Tek<sup>®</sup> O.C.T. compound. These samples will be further

361 processed for IHC.

362 **RNA extraction from frozen spinal cords.** Each frozen spinal cord from individual mice was processed

363 separately for RNA extraction. Frozen material was placed into a 2mL RNASE/DNASE free Lysing Matrix

364 D tube filled with beads (MP Biomedicals Catalog No. 6913-500) for disruption. Instructions were  
365 followed using the Qiagen RNeasy® Lipid Tissue Mini Kit (Qiagen Catalog No. 74804) thereafter. Briefly,  
366 the spinal cords were homogenized using 1ml Qiazol® Lysis Reagent (Qiagen Catalog No.79306) and  
367 FastPrep-24 5G Homogenizer (MP Biomedicals) for 40 seconds. The lysate was incubated at room  
368 temperature for 5 min, topped off with 200 µl of chloroform (Sigma-Aldrich Catalog No.C2432-500mL),  
369 shaken, incubated for 2-3min at RT, and centrifuged (12,000g at 4°C for 15min). The upper phase was  
370 transferred to 1 volume of 70% ethanol and placed into an RNeasy Mini spin column for centrifugation  
371 (8,000g at RT for 15 sec). The flow through was discarded and an optional on-column DNase digestion  
372 protocol was followed. Briefly, RNeasy® Mini spin column was washed with 350 µl of RW1 buffer then  
373 centrifuged (8,000g at RT for 15 sec). Then 80µl of DNase I incubation mix was added to the spin  
374 column (15-25°C for 15 min) and a final wash of 350 µl of RW1 buffer followed with centrifugation  
375 (8,000g at RT for 15 sec). RNA was extracted following the final steps of the Qiagen RNeasy® Lipid  
376 Tissue Mini Kit as per manufacturer's instructions. RNA samples were then prepared for Fluidigm®  
377 Biomark HD array preparation.

378 **Fluidigm Biomark HD array preparation.** Total extracted RNA was isolated from each mice spinal cord  
379 and used in preparation for Fluidigm® Biomark array. The preparation of RNA was performed with the  
380 following steps: (1) cDNA synthesis; (2) cDNA preamp PCR; (3) Biomark HD priming; (4) Biomark assay  
381 loading. For cDNA synthesis, 50 ng of total RNA from each sample (3 mice per group) was used to  
382 initiate the PCR using SuperScript III Reverse Transcriptase (Invitrogen Catalog No. 18080-093). cDNA  
383 synthesis was performed as per manufacturer's instructions. Pre-amplification of cDNA followed using  
384 the newly generated cDNA and TaqMan® PreAmp Master Mix Kit (Applied Biosystem Catalog No.  
385 4384556). The manufacturer's suggested protocol was followed with minor modifications. 20X  
386 TaqMan® Gene Expression assays (Invitrogen) were combine to a final .2X concentration. These will be  
387 used as a pooled assay mix for the PCR. Combined with the TaqMan® PreAmp Master Mix and newly

388 generated cDNA, the PCR reaction follows a hold of 95°C for 10 min and a 14X cycled reaction of 95°C  
389 for 15 sec and 60°C for 4 min. The final solution is dilute 1:5 with DNA Suspension Buffer (10mM Tris,  
390 .1mM EDTA, pH8.0, sterile and DNase/Rnase Tested) (Teknova, Catalog No. T0220).

391 After samples were preamped, the cDNA will be loaded onto a primed Fluidigm 96.96 Dynamic Array IFC  
392 (integrated fluid circuit). Manufacturer's instructions were followed. Briefly, the 96.96 IFC array was  
393 primed and loaded onto a HX machine. Samples were then prepared with TaqMan Fast Universal PCR  
394 Master Mix (Life Technologies PN435042) and loaded on one end of the array. 20X TaqMan® Gene  
395 Expression assays were mixed with 2X Assay Loading Reagent (Fluidigm PN 100-7611) and were loaded  
396 on the other end of the array. The 96.96 IFC was loaded onto the HX machine and finally transferred to  
397 Biomark HD machine. Results were analyzed using Excel and Qlucore for further analysis.

398 **Sirius Red, H&E and Masson's Trichrome staining.** Samples embedded in paraffin were mounted onto  
399 glass slides (VWR Micro Slides Catalog no 48311-703) using a rotary microtome (Sakura® Accu-Cut SRM)  
400 at a thickness of 5 µm. After drying slides overnight at 37°C, slides were stored at RT until further  
401 staining with Sirius Red. Prior to using the Picro-Sirius Red Stain Kit (Abcam Catalog No. ab150681),  
402 samples were deparaffinized. Briefly, slides were dipped in two different Xylene substitute (Fisherbrand  
403 Safe Clear II Catalog No.044-192) consecutively for 5 and 10 min. Then slides were transferred into two  
404 washes with 100% ethanol for 3 min each. This is followed by two washes with 95% ethanol for 3 min  
405 each and a final rehydration step using two washes with deionized water for 5 min each. Following  
406 dehydration, slides are stained with Picro-Sirius Red for one hour at RT. Then, the slides are rinsed in  
407 acetic acid wash twice for one minute each. Finally, slides are rinsed in 100% ethanol 3 times for 1 min  
408 each and mounted in resin. Slides were also stained with Massons Trichrome using Trichrome Stain  
409 (Abcam Catalog No. ab150686). Slides were deparaffinized and hydrated as described previously. The  
410 Bouins protocol was not followed. Instead, slides were washed in Weigert's Hematoxylin stain for 5 min  
411 at RT followed by a wash of deionized water. Then slides were washed in Biebrich Scarlet/Acid Fuchsin

412 solution for 15 min then rinsed in deionized water. Samples were then washed in Phosphomolybdic/  
413 Phosphotungstic Acid Solution for 10-15 min and placed in Aniline Blue solution for another 10-15 min.  
414 Samples were rinsed in distilled water, 1% acetic acid solution for 3-5 min, 95% ethanol twice for 30 sec  
415 each, and then 100% ethanol twice for 30 sec each. A final wash using Xylene substitute followed prior  
416 to final mounting with synthetic resin.

417 Samples for H&E staining were first deparaffinized and hydrated. Slides were placed in Hematoxylin for  
418 3 min; washed in deionized water twice for 5 min; placed in SelecTech® Define MX-aq (Leica Catalog No.  
419 3803598) for 3 min; washed in water for 1 min; washed in 70% ethanol for 30 sec; stained with eosin for  
420 30 sec; washed in 100% ethanol thrice for 1 min each and placed in Xylene Substitute twice for 3 min  
421 each. Slides were then covered slipped.

422 **Immunohistochemistry.** Frozen sections in OCT were obtained using a Cryostat Thermo Scientific  
423 Microm HM550. Sections were mounted onto slides (VWR Micro Slides Superfrost Plus Catalog No  
424 48311-703) at a thickness of 5  $\mu$ m. Slides were stored at -20°C until further staining. For anti- mouse  
425 collagen staining, individual slides were thawed and dried for 20 min at RT; fixed using acetone at -20°C  
426 for 20 min; dried again at RT for 20 min; washed in TBS for 5 min; blocked for two hours at RT with  
427 Donkey anti-mouse IgG (Jackson Labs Catalog No.715-007-003); washed 3 times with TBS-T (.05%  
428 Tween) for 2 min each; stained and incubated in a humidified chamber with rabbit anti-mouse Collagen I  
429 overnight at 4°C (1:100 dilution Abcam Catalog No. ab34710); washed 3 times in TBS-Tween (.05%  
430 Tween) for 5 min each; stained with secondary antibody donkey anti-rabbit AF647 (Abcam Catalog No.  
431 150075) for 1 hour at RT; rinsed 3 times with TBS-Tween for 5 min each; and finally mounted using  
432 Fluoroshield with DAPI (Sigma Catalog No. F6057-20ml). In conjunction with collagen I staining, anti  
433 mouse GFAP staining (astrocyte marker) was used. Anti-mouse GFAP AF594 (1:100 dilution Biologend  
434 Catalog No. 644708).

435

- 436 1. M. Bradl and H. Lassmann, Progressive multiple sclerosis. *Semin Immunopathol.* **31**(4),  
437 455-65 (2009).
- 438 2. J.R. Wujek, C. Bjartmar, E. Richer, R. M.Ransohoff, M. Yu, V. K. Tuohy, B. D. Trapp,  
439 Axon loss in the spinal cord determines permanent neurological disability in an animal  
440 model of multiple sclerosis. *J Neuropathol Exp Neurol.* **61**(1), 23-32 (2002).
- 441 3. K. Hawker, Progressive multiple sclerosis: characteristics and management. *Neurol Clin.*  
442 **29**(2), 423-34 (2011).
- 443 4. I. Ifergan, T. Davidson, H. Kebir, D. Xu, D. Macapagal, J. Cann, J. M. Rodgers, Z. N.  
444 Hunter, C. L. Pittet, S. Beddow, C. A. Jones, A. Prat, M. A. S, S. D. Miller , Targeting the  
445 GM-CSF receptor for the treatment of CNS autoimmunity. *J Autoimmun.* **84**, 1-11  
446 (2017).
- 447 5. M. El-Behi, B. Ciric, H. Dai, Y. Yan, M. Cullimore, F. Safavi, G. X. Zhang, B.N. Dittel,  
448 A. Rostami, The encephalitogenicity of T(H)17 cells is dependent on IL-1- and IL-23-  
449 induced production of the cytokine GM-CSF. *Nat Immunol.* **12**(6), 568-75 (2011).
- 450 6. J. L. McQualter, R. Darwiche, C. Ewing, M. Onuki, T. W. Kay, J. A. Hamilton, H. H.  
451 Reid, C. C. Bernard, Granulocyte macrophage colony-stimulating factor: a new putative  
452 therapeutic target in multiple sclerosis. *J Exp Med.* **194**(7), 873-82 (2001).
- 453 7. M. J. van Amerongen, G. Molema, J. Plantinga, H. Moorlag, M. J. van Luyn,  
454 Neovascularization and vascular markers in a foreign body reaction to subcutaneously  
455 implanted degradable biomaterial in mice. *Angiogenesis.* **5**(3), 173-180 (2002).
- 456 8. L. V. McIntire, Vascular assembly in engineered and natural tissues. *Ann N Y Acad Sci.*  
457 **961**, 246-248 (2002).
- 458 9. A. Birbrair, T. Zhang, D. C. Files, S. Mannava, T. Smith, Z. M. Wang, M. L. Messi, A.  
459 Mintz, O. Delbono, Type-1 pericytes accumulate after tissue injury and produce collagen  
460 in an organ-dependent manner. *Stem Cell Res Ther.* **5**(6), 122 (2014).
- 461 10. R. Neary, C. J. Watson J.A. Baugh, Epigenetics and the overhealing wound: the role of  
462 DNA methylation in fibrosis. *Fibrogenesis Tissue Repair.* **8**, 18 (2015).
- 463 11. J. Sajanti and K. Majamaa, Detection of meningeal fibrosis after subarachnoid  
464 haemorrhage by assaying procollagen propeptides in cerebrospinal fluid. *J Neurol*  
465 *Neurosurg Psychiatry.* **67**(2), 185-188. (1999).
- 466 12. H. Lassmann, K. Kitz, and H.M. Wisniewski, Histogenesis of demyelinating lesions in  
467 the spinal cord of guinea pigs with chronic relapsing experimental allergic  
468 encephalomyelitis. *J Neurol Sci.* **50**(1), 109-121 (1981).
- 469 13. P. A. Campochiaro, Ocular neovascularization. *J Mol Med (Berl).* **91**(3), 311-221 (2013).
- 470 14. S. W. Yu, B. Friedman, Q. Cheng, P. D. Lyden, Stroke-evoked angiogenesis results in a  
471 transient population of microvessels. *J Cereb Blood Flow Metab.* **27**(4), 755-763 (2007).
- 472 15. T. Lourenço, J. Paes de Faria, C. A. Bippes, J. Maia, J. A. Lopes-da-Silva, J. B. Relvas,  
473 M. Grãos , Modulation of oligodendrocyte differentiation and maturation by combined  
474 biochemical and mechanical cues. *Sci Rep.* **6**, 21563 (2016).
- 475 16. S. Asano, S. Ito, K. Takahashi, K. Furuya, M. Kondo, M. Sokabe, Y. Hasegawa, Matrix  
476 stiffness regulates migration of human lung fibroblasts. *Physiol Rep.* **5**(9), 13281 (2017).
- 477 17. A. J. Booth, R. Hadley, A. M. Cornett, A. A. Dreffs, S. A. Matthes, J. L. Tsui, K. Weiss,  
478 J. C. Horowitz, V. F. Fiore, T. H. Barker, B. B. Moore, F. J. Martinez, L. E. Niklason, E.  
479 S. White, Acellular normal and fibrotic human lung matrices as a culture system for in  
480 vitro investigation. *Am J Respir Crit Care Med.* **186**(9), 866-876 (2012).

- 481 18. B. Hinz, G. Celetta, J. J. Tomasek, G. Gabbiani, C. Chaponnier, Alpha-smooth muscle  
482 actin expression upregulates fibroblast contractile activity. *Mol Biol Cell.* **12**(9), 2730-  
483 2741 (2001).
- 484 19. D. Duscher, Z. N. Maan, V. W. Wong, R. C. Rennert, M. Januszyk, M. Rodrigues, M.  
485 Hu, A. J. Whitmore, A. J. Whittam, M. T. Longaker, G. C. Gurtner, Duscher,  
486 Mechanotransduction and fibrosis. *J Biomech.* **47**(9), 1997-2005 (2014).
- 487 20. S. A. Liddel, K. A. Guttenplan, L. E. Clarke, F. C. Bennett, C. J. Bohlen, L. Schirmer,  
488 M. L. Bennett, A. E. Münch, W. S. Chung, T. C. Peterson, D. K. Wilton, A. Frouin, B.  
489 A. Napier, N. Panicker, M. Kumar, M. S. Buckwalter, D. H. Rowitch, V. L. Dawson, T.  
490 M. Dawson, B. Stevens, B. A. Barres, Neurotoxic reactive astrocytes are induced by  
491 activated microglia. *Nature.* **541**(7638), 481-487 (2017).
- 492 21. N. Itoh, Y. Itoh, A. Tassoni, E. Ren, M. Kaito, A. Ohno, Y. Ao, V. Farkhondeh, H.  
493 Johnsonbaugh, J. Burda, M. V. Sofroniew, R. R. Voskuhl, Cell-specific and region-  
494 specific transcriptomics in the multiple sclerosis model: Focus on astrocytes. *Proc Natl*  
495 *Acad Sci U S A.* **115**(2), E302-E309 (2018).
- 496 22. M. Cambron, M. D'Haeseleer, G. Laureys, R. Clinckers, J. Debruyne, J. De Keyser,  
497 White-matter astrocytes, axonal energy metabolism, and axonal degeneration in multiple  
498 sclerosis. *J Cereb Blood Flow Metab.* **32**(3) 413-24 (2012).
- 499 23. N. Dargahi, M. Katsara, T. Tselios, M. E. Androutsou, M. de Courten, J. Matsoukas, V.  
500 Apostolopoulos, Multiple Sclerosis: Immunopathology and Treatment Update. *Brain Sci.*  
501 **7**(7) 78 (2017).
- 502 24. O. Torkildsen, K.M. Myhr, and L. Bo, Disease-modifying treatments for multiple  
503 sclerosis - a review of approved medications. *Eur J Neurol.* **23 Suppl 1**, 18-27 (2016).
- 504 25. A. Abdelhak, M.S. Weber, and H. Tumani, Primary Progressive Multiple Sclerosis:  
505 Putting Together the Puzzle. *Front Neurol.* **8**, 234 (2017).

506

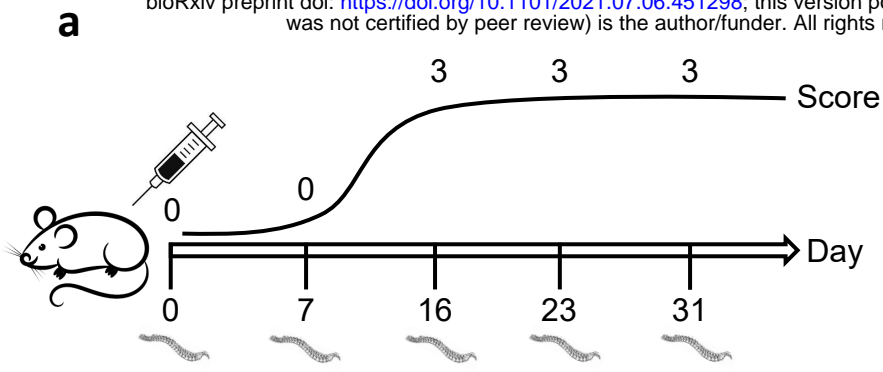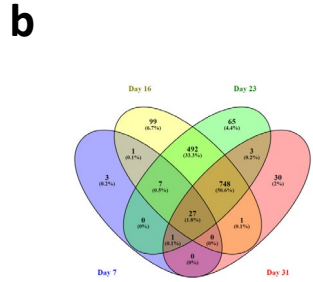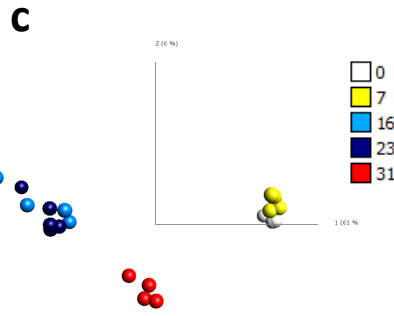

**e**

INF- $\gamma$   
Response

Pre Acute Chronic

**f**

Inflam  
Response

Pre Acute Chronic

**d**

INF- $\alpha$   
Response

Pre Acute Chronic

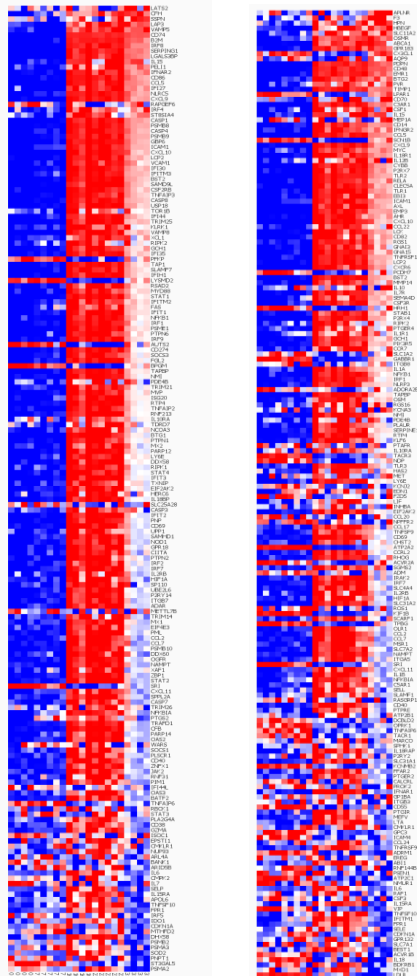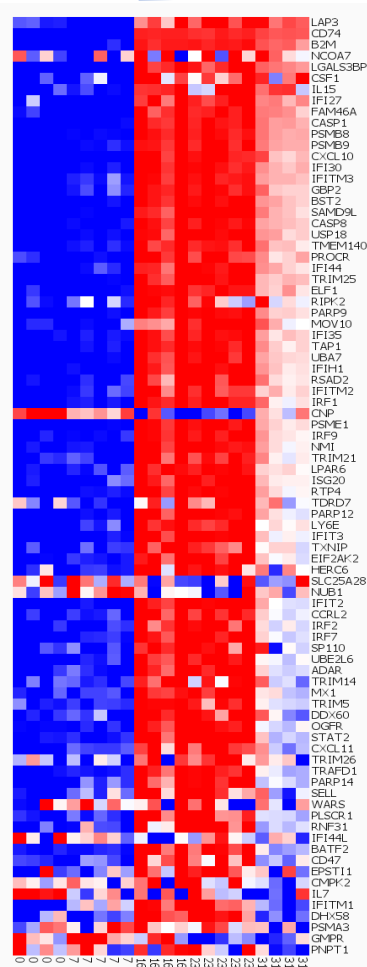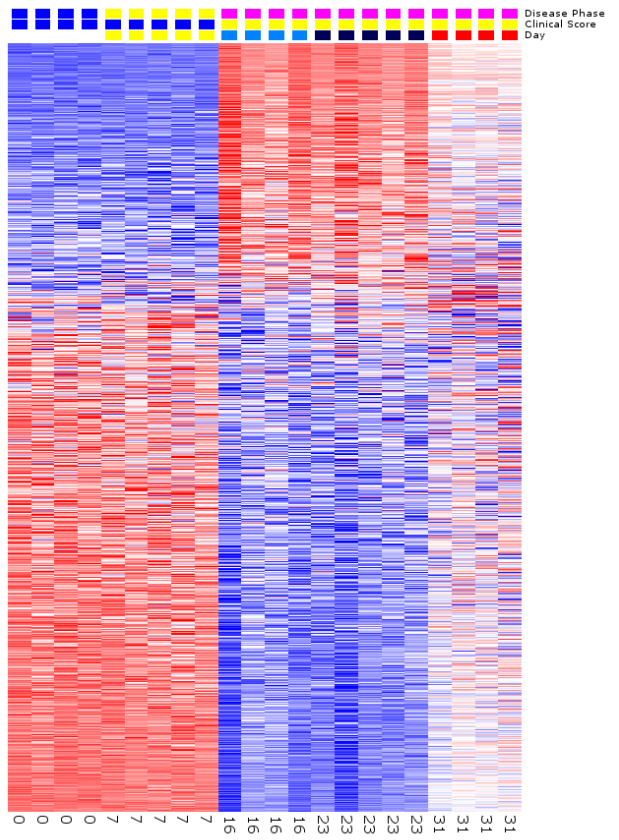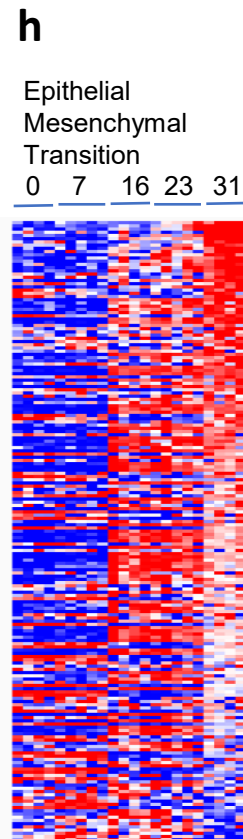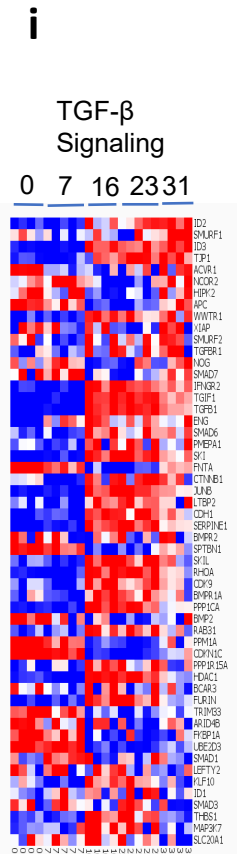



- Figure 1: A, Schematic of experimental design. B6 mice were immunized with MOG35-55 on day zero and spinal cords were harvested on the indicated days. Mice sacrificed on days 0 and 7 had a clinical score of 0, while only mice with a clinical score of 3 were selected at the following time points. B, Venn diagram showing the overlap of regulated genes at the indicated time points. C, PCA plot showing clustering of individual mice at the indicated time points for genes regulated at  $FDR < 0.05$ . D. Heatmap display of using the same parameters as in C. E-I, Heatmaps of genes regulated in GSEA genes sets according to disease phase.

**a**

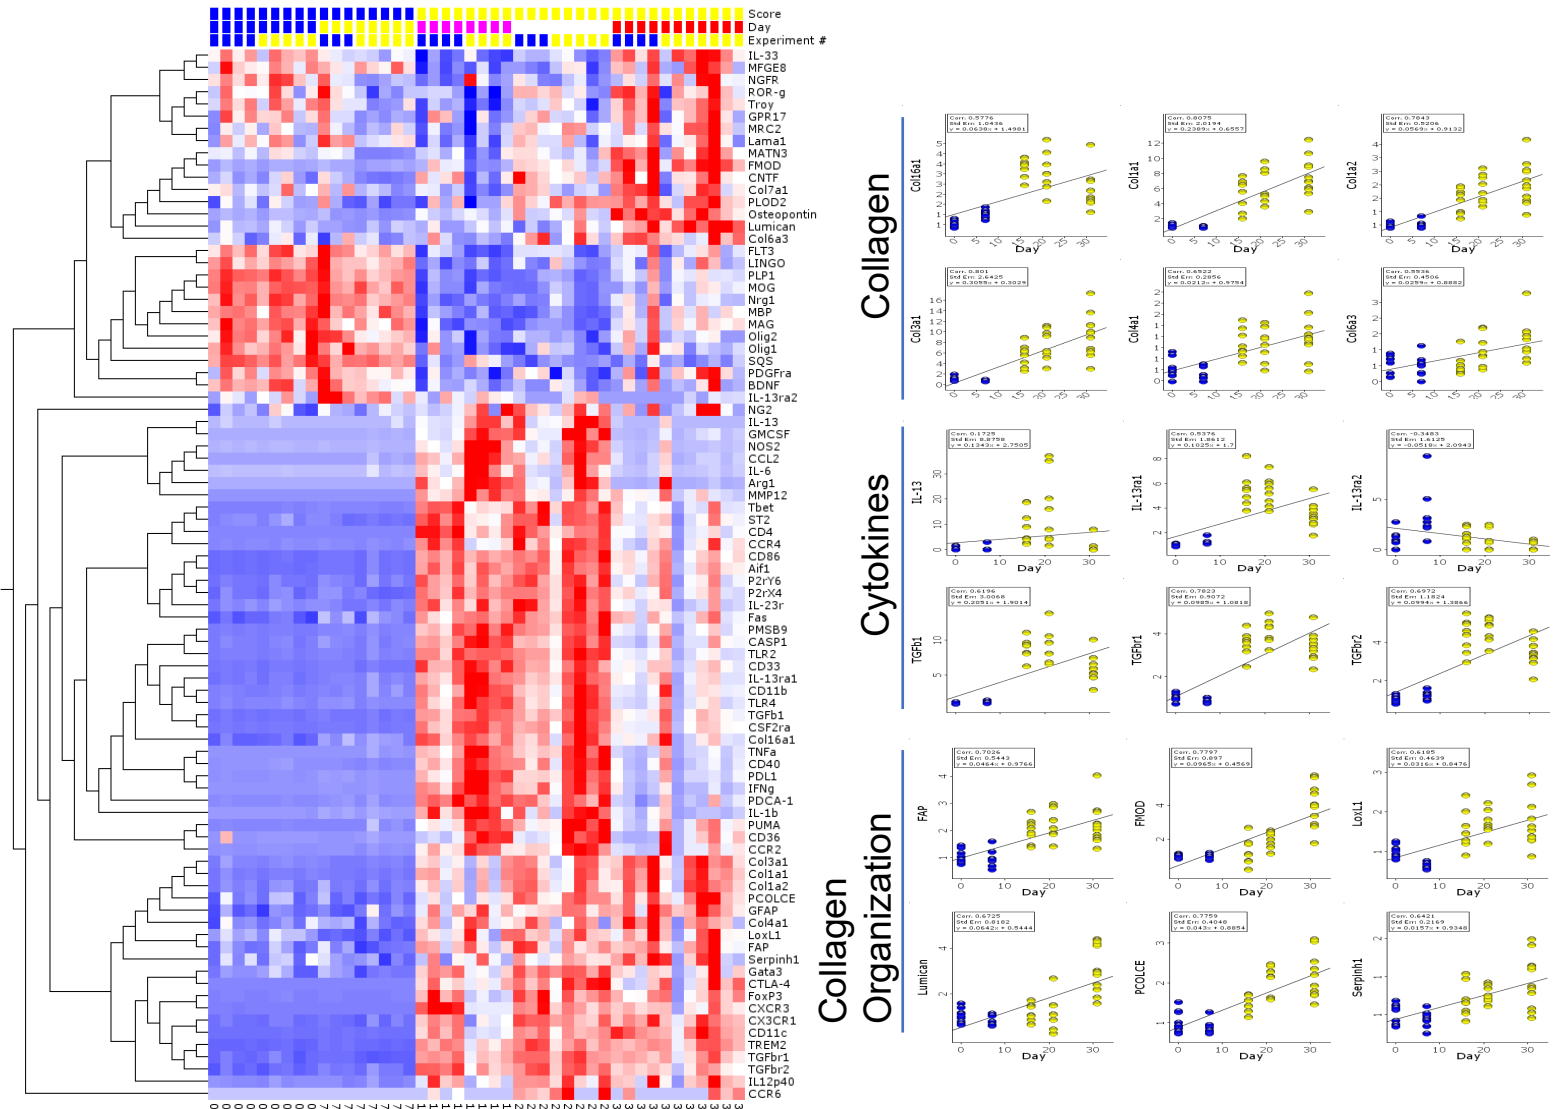

**c**

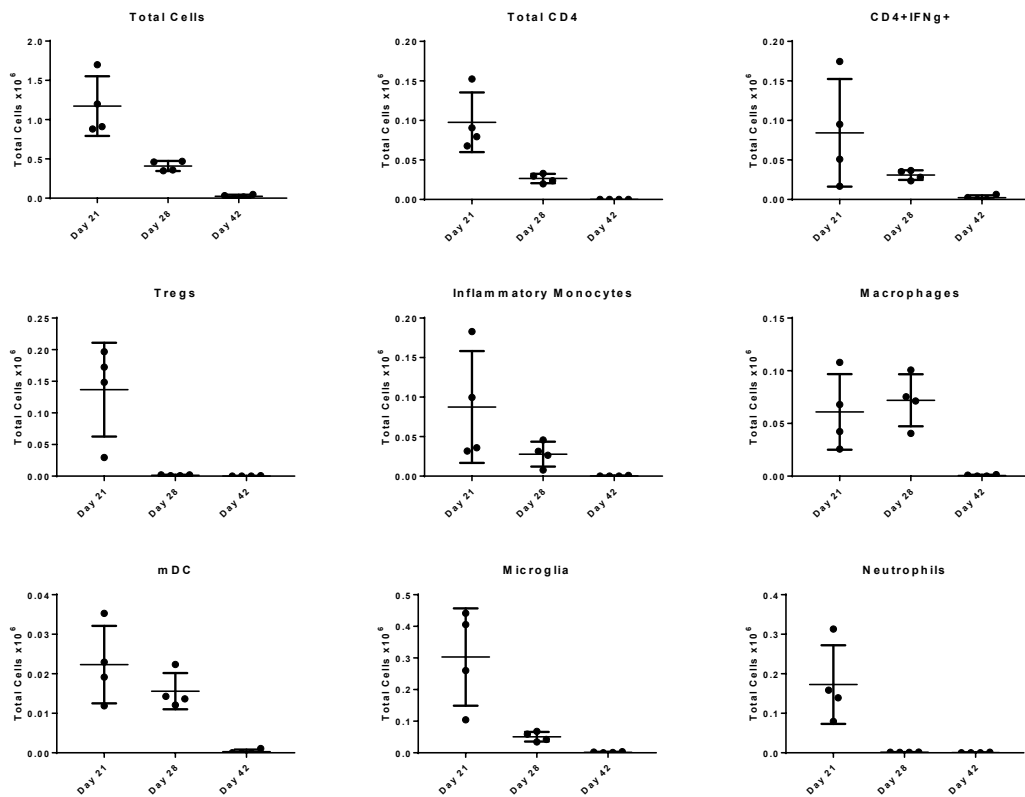

Figure 2: A, Fluidigm analysis of genes identified in the gene array. Genes were selected based on their appearance in the GSEA gene sets related to collagen, cytokines, and collagen organization. B, Kinetic profiles of select gene expression levels as determined by Fluidigm analysis. Pre-disease indicated in blue, active disease indicated in yellow. C, Total cell counts of the indicated populations in the spinal cord as determined by flow cytometry. Total cells are all CD45+ cells, total CD4 is CD45+CD4+, CD4+IFN $\gamma$ + is CD45+CD4+IFN $\gamma$ +, Tregs are CD45+CD4+Foxp3+, Inflammatory monocytes are CD45+ CD11b<sup>+</sup> CD11c<sup>-</sup> Ly6G<sup>-</sup> Ly6C<sup>hi</sup>, macrophages are CD45+ CD11b<sup>+</sup> CD11c<sup>-</sup> Ly6G<sup>-</sup>.

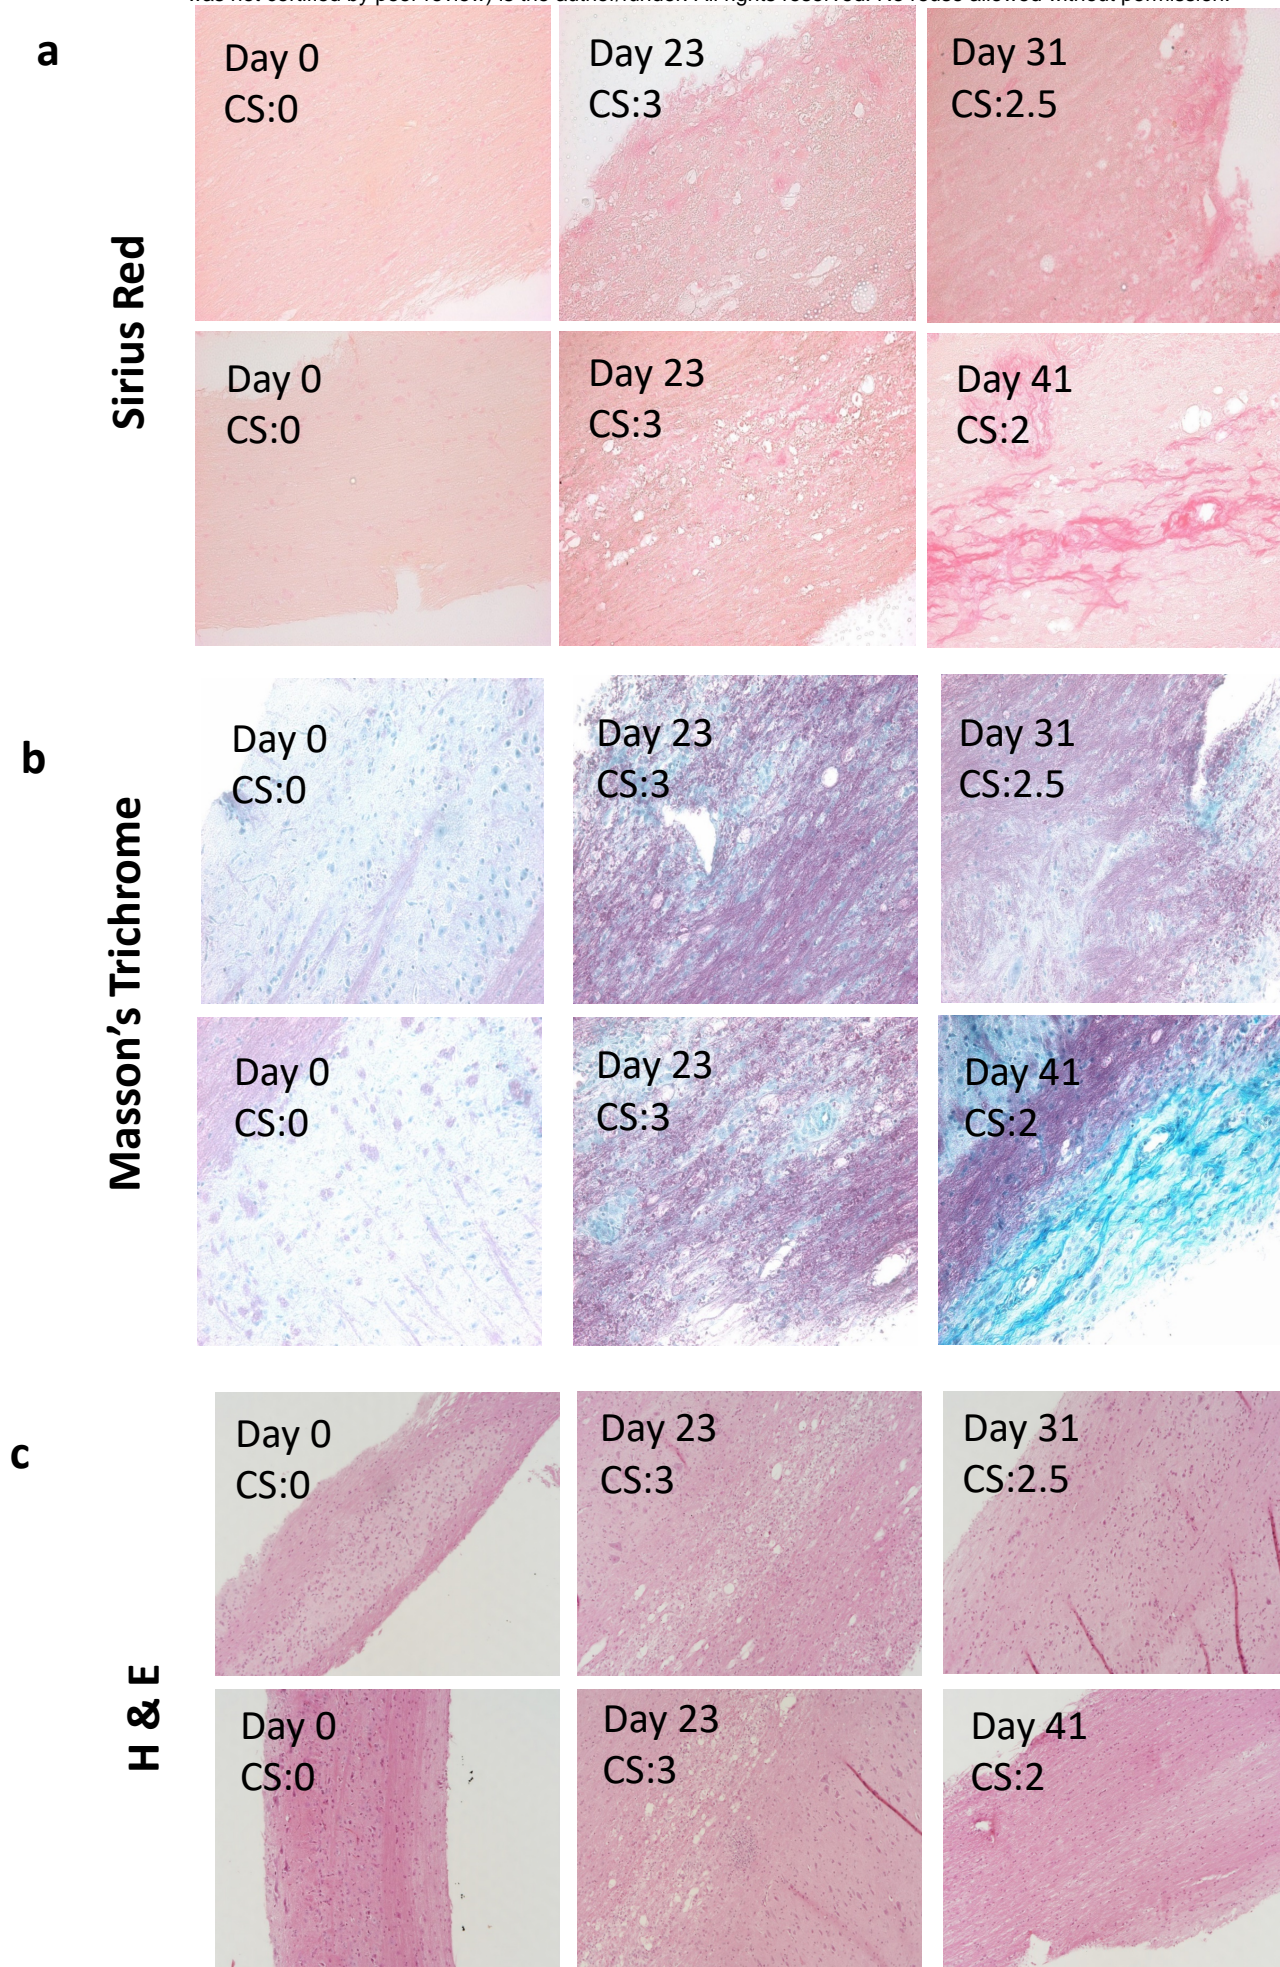

Figure 3: B6 mice were immunized for EAE and sacrificed on the indicated days. The clinical score (CS) of each individual animal is indicated. Serial sections were stained with Sirius Red, A, Masson's Trichrome, B, or H&E, C, to identify areas of fibrosis and to characterize histologically.

**a**

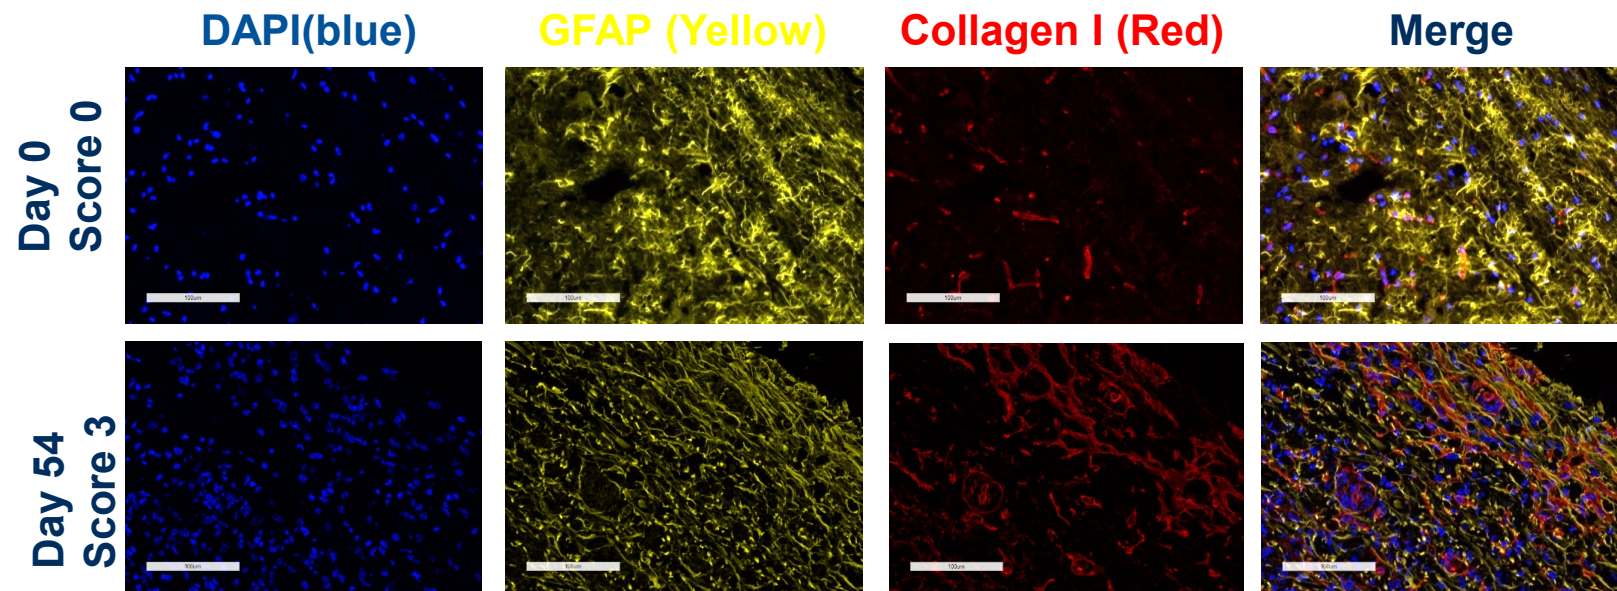

**b**

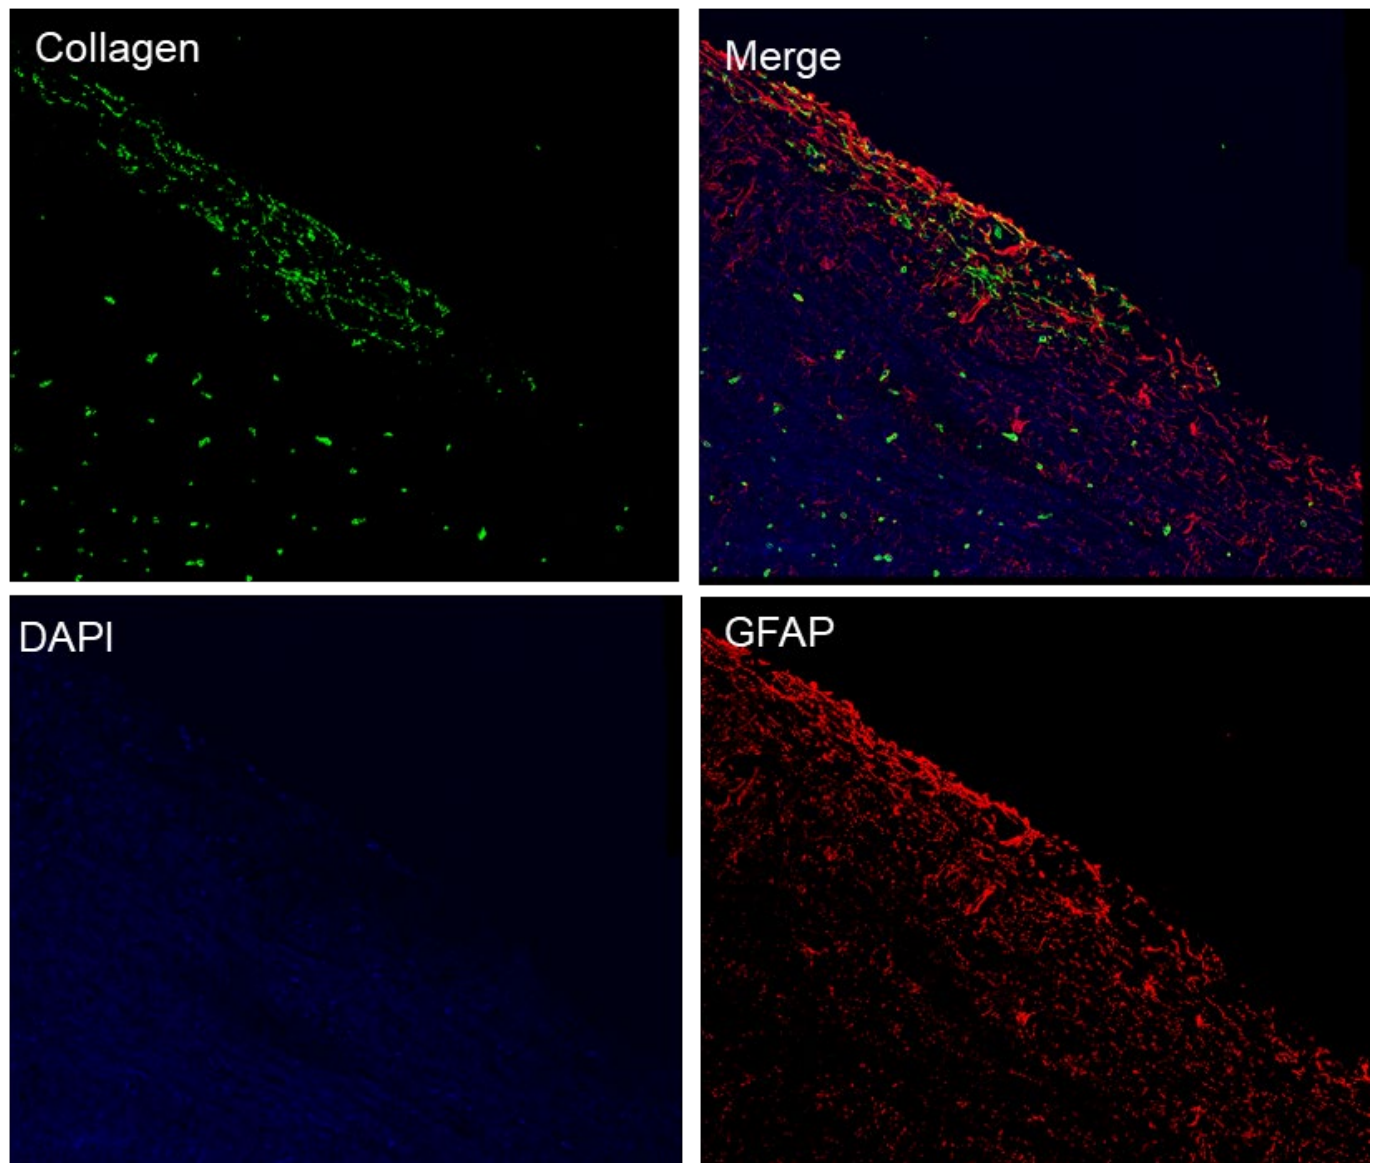

**Figure 4: Fluorescent microscopy demonstrates co-localization of collagen to GFAP+ astrocytes.** B6 mice were immunized for EAE and sacrificed at either day 0 (clinical score of 0) or day 54 (clinical score of 3). Spinal cords were collected and processed for fluorescent microscopy by staining with GFAP (yellow), Collagen 1 (red) and DAPI (blue) and analyzed by fluorescent microscopy, A, or by confocal microscopy, B.

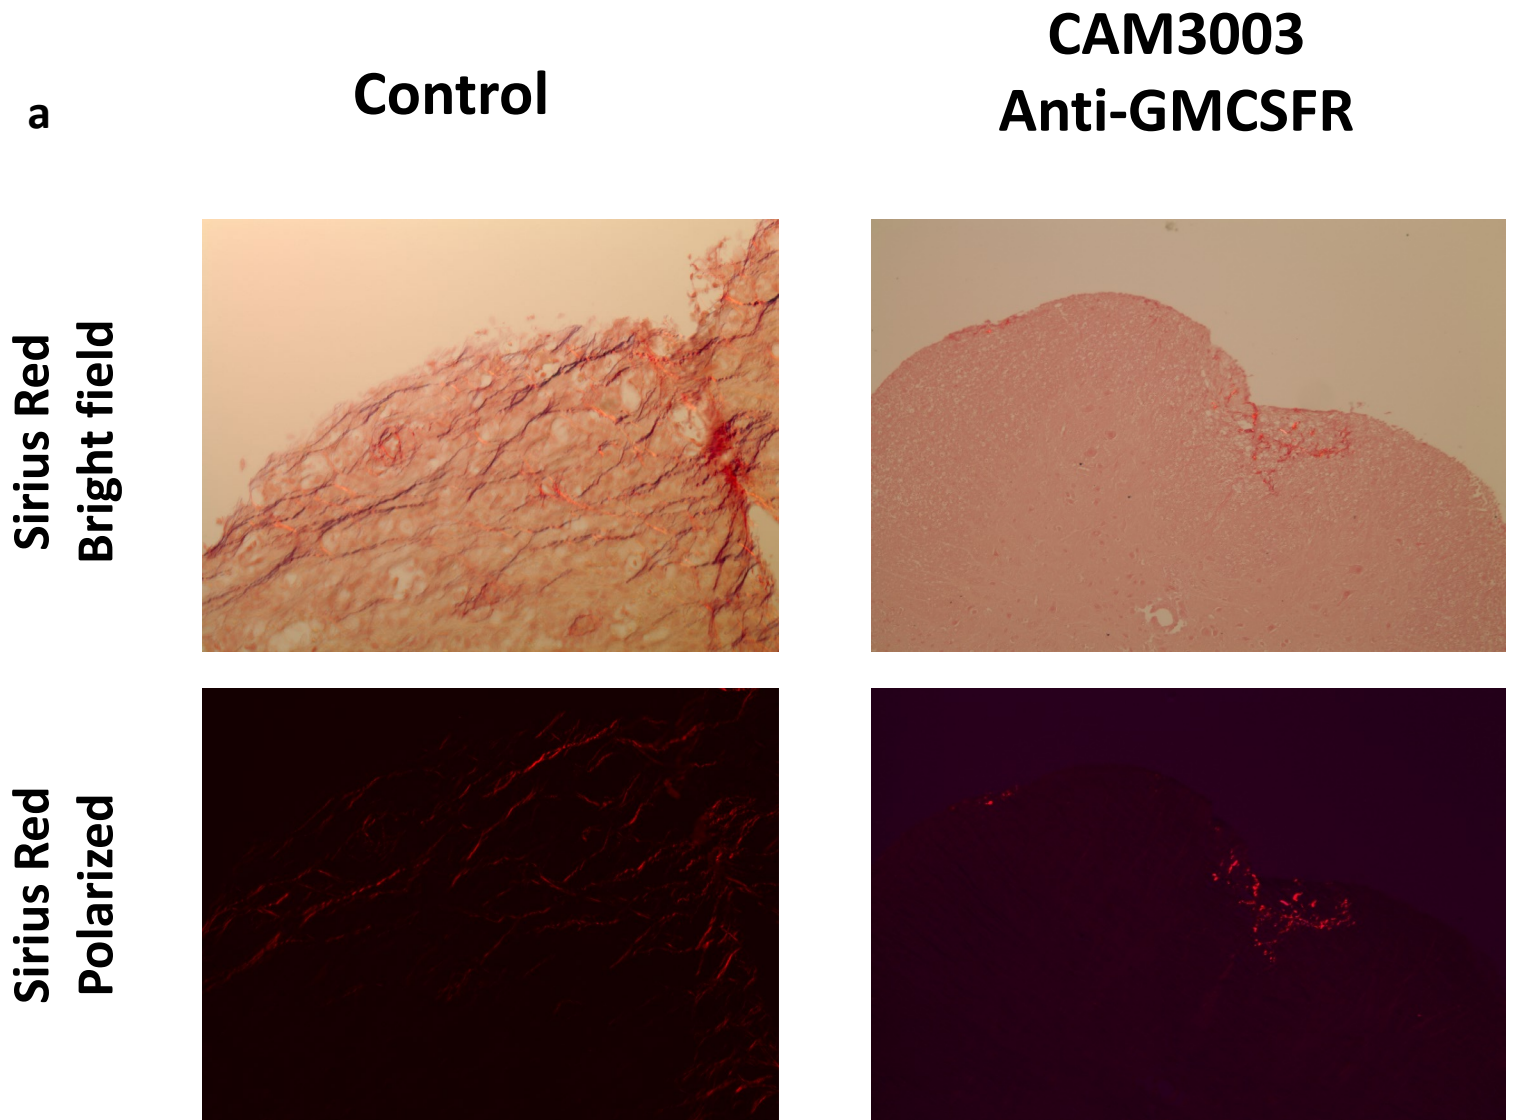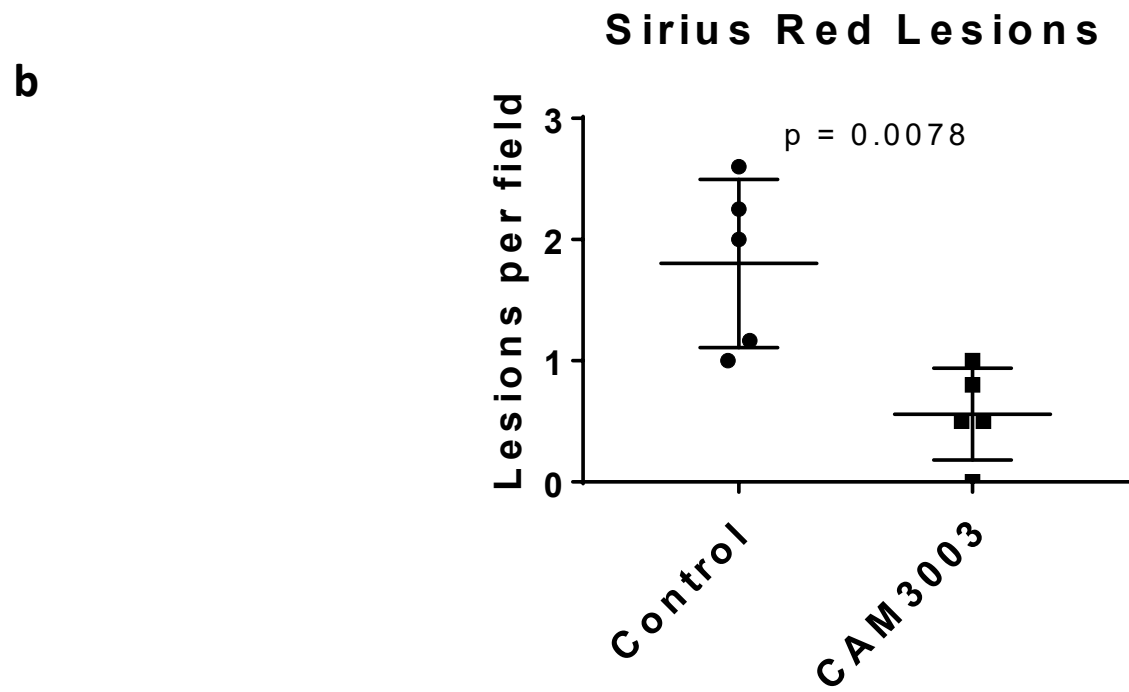



**Figure 5: Anti-GMCSFR prevents the establishment of fibrosis in the CNS.** B6 mice were immunized for EAE. At peak of disease (day 14) mice were treated intraperitoneally every other day with 10mg/kg anti-GMCSFR (CAM3003) or control until disease subsided. Spinal cords were collected, paraffin embedded and stained with Sirius Red to detect collagen deposition. A, representative images obtained under either brightfield or polarized conditions at 20X magnification. B, each dot represents the average lesions per field for an individual mouse obtained under 10X magnification for mice that received either CAM3003 or control treatments.

5X

20X

**a**

**Collagen-1a**

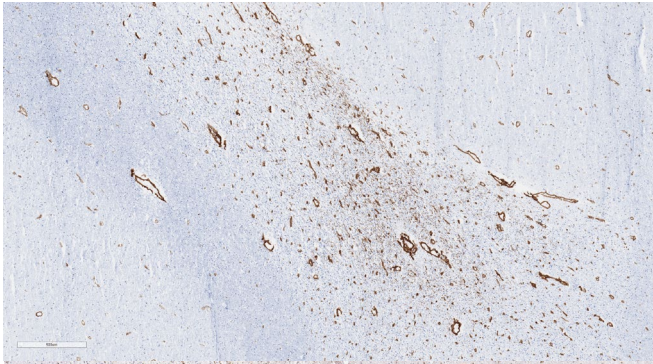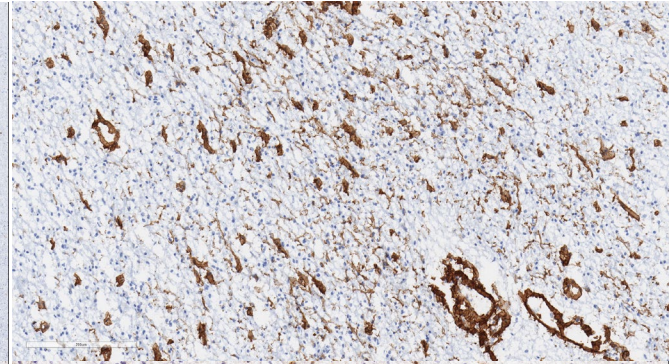

**b**

**CD31**

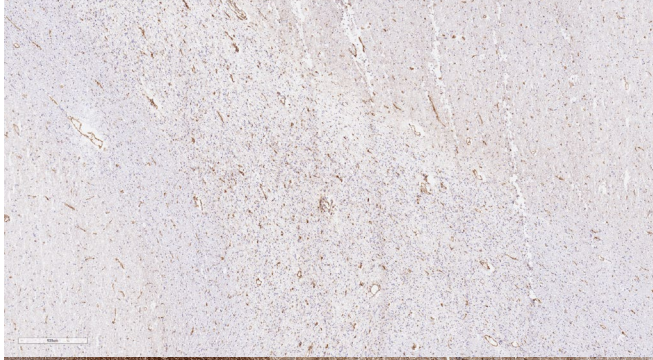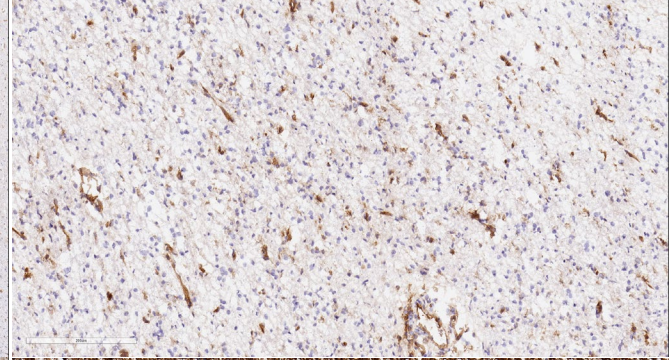

**c**

**GFAP**

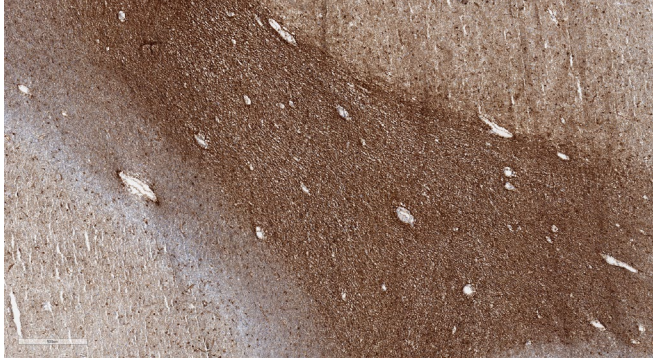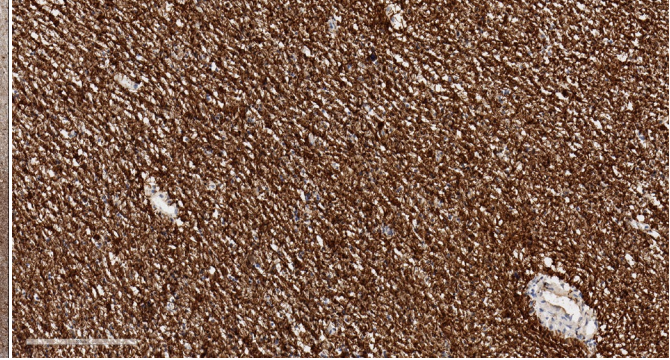

*Jennifer Cann, Georgia Creswell*

Figure 6: Collagen deposition in MS plaques. Samples of human MS tissue were stained for collagen-1a, A, CD31, B, or GFAP, C and evaluated by brightfield microscopy.
